# Supplementary material for: Diskontinuitäten der medikamentösen und medizinischen Versorgung älterer türkeistämmiger Versicherter
Source: Springer Nature journal article supplement (doi:10.1007/s44266-023-00095-3), 2023-08-14
Supplement: MOESM1 [file 25921310]

Online-Supplement 1

Tab. 4: Vergleich türkeistämmiger und nicht türkeistämmiger Versicherter, Diskontinuitäten laut Indikatoren A-C, weibliche Versicherte mit Diabetes mellitus, nach Altersgruppen, 2013-2018

| Indikator           | N     |        | Indikator A         |        | Indikator B         |       | Indikator C         |       |
|---------------------|-------|--------|---------------------|--------|---------------------|-------|---------------------|-------|
|                     | T     | NT     | T                   | NT     | T                   | NT    | T                   | NT    |
| <b>Herkunft</b>     |       |        |                     |        |                     |       |                     |       |
| <b>Altersgruppe</b> |       |        |                     |        |                     |       |                     |       |
| <b>60 – 64</b>      | 2.227 | 15.204 | 1.692               | 7.171  | 718                 | 2.195 | 343                 | 745   |
| <b>65 – 69</b>      | 1.961 | 13.470 | 1.562               | 5.931  | 656                 | 1.814 | 283                 | 597   |
| <b>70 – 74</b>      | 1.164 | 19.669 | 920                 | 8.163  | 377                 | 2.417 | 181                 | 814   |
| <b>≥ 75</b>         | 483   | 33.133 | 372                 | 13.816 | 147                 | 4.087 | 56                  | 1.485 |
|                     | N     |        | RR [KI]             |        | RR [KI]             |       | RR [KI]             |       |
| <b>60 – 64</b>      | 2.227 | 15.204 | 1,61 [1,55 – 1,67]* |        | 2,23 [2,03 – 2,45]* |       | 3,14 [2,68 – 3,68]* |       |
| <b>65 – 69</b>      | 1.961 | 13.470 | 1,87 [1,80 – 1,94]* |        | 2,48 [2,25 – 2,74]* |       | 3,26 [2,73 – 3,87]* |       |
| <b>70 – 74</b>      | 1.164 | 19.669 | 1,90 [1,82 – 1,99]* |        | 2,64 [2,33 – 2,96]* |       | 3,76 [3,08 – 4,56]* |       |
| <b>≥ 75</b>         | 483   | 33.133 | 1,85 [1,72 – 1,96]* |        | 2,47 [2,05 – 2,94]* |       | 2,59 [1,85 – 3,57]* |       |

<sup>1</sup>T: türkeistämmige Versicherte, NT: nicht türkeistämmige Versicherte

\* Sign. bei Konfidenzniveau 99 %; RR: Relatives Risiko; KI: Konfidenzintervall

Datenquelle: Abrechnungsdaten AOK Rheinland/Hamburg 2012-2018, Datenhalter: AOK Rheinland/Hamburg  
Eigene Darstellung

**Tab. 5: Vergleich türkeistämmiger und nicht türkeistämmiger Versicherter, Diskontinuitäten laut Indikatoren A-C, männliche Versicherte mit Asthma Bronchiale, nach Altersgruppen, 2013-2018**

| Indikator           | N   |       | Indikator A         |       | Indikator B         |     | Indikator C        |    |
|---------------------|-----|-------|---------------------|-------|---------------------|-----|--------------------|----|
|                     | T   | NT    | T                   | NT    | T                   | NT  | T                  | NT |
| <b>Herkunft</b>     |     |       |                     |       |                     |     |                    |    |
| <b>Altersgruppe</b> |     |       |                     |       |                     |     |                    |    |
| <b>60 – 64</b>      | 340 | 4.980 | 266                 | 2.933 | 63                  | 668 | 8                  | 66 |
| <b>65 – 69</b>      | 477 | 3.606 | 378                 | 1.883 | 92                  | 453 | 11                 | 52 |
| <b>70 – 74</b>      | 360 | 3.738 | 286                 | 1.797 | 83                  | 442 | 8                  | 44 |
| <b>≥ 75</b>         | 154 | 3.644 | 120                 | 1.661 | 40                  | 452 | 3                  | 35 |
|                     | N   |       | RR [KI]             |       | RR [KI]             |     | RR [KI]            |    |
| <b>60 – 64</b>      | 340 | 4.980 | 1,33 [1,22 – 1,43]* |       | 1,38 [1,01 - 1,86]* |     | 1,78 [0,70 – 4,41] |    |
| <b>65 – 69</b>      | 477 | 3.606 | 1,52 [1,40 – 1,63]* |       | 1,54 [1,17 – 1,99]* |     | 1,60 [0,70 - 3,62] |    |
| <b>70 – 74</b>      | 360 | 3.738 | 1,65 [1,51 – 1,78]* |       | 1,95 [1,47 - 2,54]* |     | 1,89 [0,73 - 4,81] |    |
| <b>≥ 75</b>         | 154 | 3.644 | 1,71 [1,49 – 1,90]* |       | 2,09 [1,43 – 2,96]* |     | 2,03 [0,49 – 8,14] |    |

<sup>1</sup>T: türkeistämmige Versicherte, NT: nicht türkeistämmige Versicherte

\*Sign. bei Konfidenzniveau 99 %; RR: Relatives Risiko; KI: Konfidenzintervall

Datenquelle: Abrechnungsdaten AOK Rheinland/Hamburg 2012-2018, Datenhalter: AOK Rheinland/Hamburg  
Eigene Darstellung

**Tab. 6: Vergleich türkeistämmiger und nicht türkeistämmiger Versicherter, Diskontinuitäten laut Indikatoren A-C, weibliche Versicherte mit Asthma Bronchiale, nach Altersgruppen, 2013-2018**

| Indikator           | N     |       | Indikator A         |       | Indikator B         |       | Indikator C         |     |
|---------------------|-------|-------|---------------------|-------|---------------------|-------|---------------------|-----|
|                     | T     | NT    | T                   | NT    | T                   | NT    | T                   | NT  |
| <b>Herkunft</b>     |       |       |                     |       |                     |       |                     |     |
| <b>Altersgruppe</b> |       |       |                     |       |                     |       |                     |     |
| <b>60 – 64</b>      | 1.003 | 7.783 | 796                 | 4.531 | 193                 | 1.050 | 39                  | 137 |
| <b>65 – 69</b>      | 760   | 5.935 | 597                 | 3.259 | 135                 | 804   | 17                  | 87  |
| <b>70 – 74</b>      | 391   | 7.163 | 312                 | 3.567 | 96                  | 844   | 11                  | 107 |
| <b>≥ 75</b>         | 179   | 9.073 | 153                 | 4.336 | 41                  | 1.102 | 7                   | 142 |
|                     | N     |       | RR [KI]             |       | RR [KI]             |       | RR [KI]             |     |
| <b>60 – 64</b>      | 1.003 | 7.783 | 1,36 [1,30 – 1,43]* |       | 1,43 [1,19 - 1,71]* |       | 2,21 [1,40 - 3,47]* |     |
| <b>65 – 69</b>      | 760   | 5.935 | 1,43 [1,35 – 1,51]* |       | 1,31 [1,05 - 1,62]* |       | 1,53 [0,78 - 2,95]  |     |
| <b>70 – 74</b>      | 391   | 7.163 | 1,60 [1,48 – 1,71]* |       | 2,08 [1,62 – 2,63]* |       | 1,88 [0,86 - 4,09]  |     |
| <b>≥ 75</b>         | 179   | 9.073 | 1,79 [1,61 – 1,92]* |       | 1,89 [1,30 – 2,65]* |       | 2,50 [0,96 - 6,27]  |     |

<sup>1</sup>T: türkeistämmige Versicherte, NT: nicht türkeistämmige Versicherte

\*Sign. bei Konfidenzniveau 99 %; RR: Relatives Risiko; KI: Konfidenzintervall

Datenquelle: Abrechnungsdaten AOK Rheinland/Hamburg 2012-2018, Datenhalter: AOK Rheinland/Hamburg  
Eigene Darstellung

**Tab. 7: Vergleich türkeistämmiger und nicht türkeistämmiger Versicherter, Diskontinuitäten laut Indikatoren A-C, männliche Versicherte mit koronarer Herzkrankheit, nach Altersgruppen, 2013-2018**

| Indikator           | N    |       | Indikator A         |       | Indikator B        |     | Indikator C         |    |
|---------------------|------|-------|---------------------|-------|--------------------|-----|---------------------|----|
|                     | T    | NT    | T                   | NT    | T                  | NT  | T                   | NT |
| <b>Herkunft</b>     |      |       |                     |       |                    |     |                     |    |
| <b>Altersgruppe</b> |      |       |                     |       |                    |     |                     |    |
| <b>60 – 64</b>      | 897  | 16945 | 700                 | 9856  | 4                  | 83  | 1                   | 19 |
| <b>65 – 69</b>      | 1499 | 14885 | 1215                | 8073  | 11                 | 79  | 2                   | 17 |
| <b>70 – 74</b>      | 1306 | 19367 | 1097                | 9630  | 9                  | 111 | 2                   | 18 |
| <b>≥ 75</b>         | 650  | 24097 | 534                 | 11548 | 5                  | 158 | 2                   | 30 |
|                     | N    |       | RR [KI]             |       | RR [KI]            |     | RR [KI]             |    |
| <b>60 – 64</b>      | 897  | 16945 | 1,34 [1,27 – 1,40]* |       | 0,91 [0,26 – 3,12] |     | 0,99 [0,11 – 8,77]  |    |
| <b>65 – 69</b>      | 1499 | 14885 | 1,49 [1,44 – 1,55]* |       | 1,38 [0,62 – 3,08] |     | 1,17 [0,21 – 6,44]  |    |
| <b>70 – 74</b>      | 1306 | 19367 | 1,69 [1,63 – 1,75]* |       | 1,20 [0,51 - 2,84] |     | 1,65 [0,30 – 9,04]  |    |
| <b>≥ 75</b>         | 650  | 24097 | 1,71 [1,62 – 1,79]* |       | 1,17 [0,39 – 3,53] |     | 2,47 [0,46 – 13,12] |    |

<sup>1</sup>T: türkeistämmige Versicherte, NT: nicht türkeistämmige Versicherte

\*Sign. bei Konfidenzniveau 99 %; RR: Relatives Risiko; KI: Konfidenzintervall

Datenquelle: Abrechnungsdaten AOK Rheinland/Hamburg 2012-2018, Datenhalter: AOK Rheinland/Hamburg  
Eigene Darstellung

**Tab. 8: Vergleich türkeistämmiger und nicht türkeistämmiger Versicherter, Diskontinuitäten laut Indikatoren A-C, weibliche Versicherte mit koronarer Herzkrankheit, nach Altersgruppen, 2013-2018**

| Indikator           | N    |       | Indikator A         |       | Indikator B         |     | Indikator C         |    |
|---------------------|------|-------|---------------------|-------|---------------------|-----|---------------------|----|
|                     | T    | NT    | T                   | NT    | T                   | NT  | T                   | NT |
| <b>Herkunft</b>     |      |       |                     |       |                     |     |                     |    |
| <b>Altersgruppe</b> |      |       |                     |       |                     |     |                     |    |
| <b>60 – 64</b>      | 1171 | 10948 | 914                 | 6233  | 9                   | 40  | 1                   | 8  |
| <b>65 – 69</b>      | 1197 | 10713 | 929                 | 5702  | 12                  | 55  | 2                   | 5  |
| <b>70 – 74</b>      | 788  | 17695 | 618                 | 8830  | 6                   | 99  | 1                   | 22 |
| <b>≥ 75</b>         | 385  | 36523 | 303                 | 17889 | 7                   | 229 | 2                   | 45 |
|                     | N    |       | RR [KI]             |       | RR [KI]             |     | RR [KI]             |    |
| <b>60 – 64</b>      | 1171 | 10948 | 1,37 [1,31 – 1,43]* |       | 2,10 [0,84 – 5,24]  |     | 1,17 [0,12 – 10,90] |    |
| <b>65 – 69</b>      | 1197 | 10713 | 1,46 [1,39 – 1,52]* |       | 1,95 [0,88 – 4,32]  |     | 3,58 [0,55 – 23,18] |    |
| <b>70 – 74</b>      | 788  | 17695 | 1,57 [1,49 – 1,65]* |       | 1,36 [0,48 - 3,80]  |     | 1,02 [0,12 – 8,95]  |    |
| <b>≥ 75</b>         | 385  | 36523 | 1,61 [1,49 – 1,71]* |       | 2,90 [1,12 – 7,37]* |     | 4,22 [0,80 – 21,91] |    |

<sup>1</sup>T: türkeistämmige Versicherte, NT: nicht türkeistämmige Versicherte

\*Sign. bei Konfidenzniveau 99 %; RR: Relatives Risiko; KI: Konfidenzintervall

Datenquelle: Abrechnungsdaten AOK Rheinland/Hamburg 2012-2018, Datenhalter: AOK Rheinland/Hamburg  
Eigene Darstellung

**Tab. 9: Vergleich türkeistämmiger und nicht türkeistämmiger Versicherter, Diskontinuitäten laut Indikatoren A-B, männliche Versicherte mit arterieller Hypertonie, nach Altersgruppen, 2013-2018**

| Indikator           | N     |        | Indikator A         |        | Indikator B        |       |
|---------------------|-------|--------|---------------------|--------|--------------------|-------|
|                     | T     | NT     | T                   | NT     | T                  | NT    |
| <b>Herkunft</b>     |       |        |                     |        |                    |       |
| <b>Altersgruppe</b> |       |        |                     |        |                    |       |
| <b>60 – 64</b>      | 1.670 | 41.042 | 1.324               | 25.076 | 54                 | 1.289 |
| <b>65 – 69</b>      | 2.684 | 32.582 | 2.215               | 18.208 | 94                 | 984   |
| <b>70 – 74</b>      | 2.257 | 38.241 | 1.914               | 19.016 | 86                 | 1.145 |
| <b>≥ 75</b>         | 1.083 | 42.617 | 901                 | 19.377 | 47                 | 1.434 |
|                     | N     |        | RR [KI]             |        | RR [KI]            |       |
| <b>60 – 64</b>      | 1.670 | 41.042 | 1,30 [1,25 – 1,34]* |        | 1,03 [0,72 - 1,46] |       |
| <b>65 – 69</b>      | 2.684 | 32.582 | 1,48 [1,44 – 1,51]* |        | 1,16 [0,88 - 1,52] |       |
| <b>70 – 74</b>      | 2.257 | 38.241 | 1,71 [1,66 – 1,75]* |        | 1,27 [0,96 - 1,68] |       |
| <b>≥ 75</b>         | 1.083 | 42.617 | 1,83 [1,76 – 1,90]* |        | 1,29 [0,89 - 1,86] |       |

<sup>1</sup>T: türkeistämmige Versicherte, NT: nicht türkeistämmige Versicherte

\*Sign. bei Konfidenzniveau 99 %; RR: Relatives Risiko; KI: Konfidenzintervall

Datenquelle: Abrechnungsdaten AOK Rheinland/Hamburg 2012-2018, Datenhalter: AOK Rheinland/Hamburg  
Eigene Darstellung

**Tab. 10: Vergleich türkeistämmiger und nicht türkeistämmiger Versicherter, Diskontinuitäten laut Indikatoren A-B weibliche Versicherte mit arterieller Hypertonie, nach Altersgruppen, 2013-2018**

| Indikator           | N     |        | Indikator A         |        | Indikator B         |       |
|---------------------|-------|--------|---------------------|--------|---------------------|-------|
|                     | T     | NT     | T                   | NT     | T                   | NT    |
| <b>Herkunft</b>     |       |        |                     |        |                     |       |
| <b>Altersgruppe</b> |       |        |                     |        |                     |       |
| <b>60 – 64</b>      | 3.729 | 43.282 | 3.010               | 26.556 | 175                 | 1.525 |
| <b>65 – 69</b>      | 3.345 | 37.159 | 2.733               | 20.620 | 154                 | 1.306 |
| <b>70 – 74</b>      | 1.935 | 52.702 | 1.562               | 26.135 | 110                 | 1.818 |
| <b>≥ 75</b>         | 954   | 88.981 | 769                 | 39.016 | 47                  | 3.525 |
|                     | N     |        | RR [KI]             |        | RR [KI]             |       |
| <b>60 – 64</b>      | 3.729 | 43.282 | 1,32 [1,28 – 1,35]* |        | 1,33 [1,09 - 1,63]* |       |
| <b>65 – 69</b>      | 3.345 | 37.159 | 1,47 [1,44 – 1,51]* |        | 1,31 [1,06 - 1,62]* |       |
| <b>70 – 74</b>      | 1.935 | 52.702 | 1,63 [1,58 – 1,68]* |        | 1,65 [1,29 - 2,10]* |       |
| <b>≥ 75</b>         | 954   | 88.981 | 1,84 [1,76 – 1,91]* |        | 1,24 [0,86 - 1,79]  |       |

<sup>1</sup>T: türkeistämmige Versicherte, NT: nicht türkeistämmige Versicherte

\*Sign. bei Konfidenzniveau 99 %; RR: Relatives Risiko; KI: Konfidenzintervall

Datenquelle: Abrechnungsdaten AOK Rheinland/Hamburg 2012-2018

Datenhalter: AOK Rheinland/Hamburg

Eigene Darstellung
